# Supplementary material for: Characterising an implementation intervention in terms of behaviour change techniques and theory: the ‘Sepsis Six’ clinical care bundle
Source: PubMed Central journal article supplement (PMC4529730; doi:10.1186/s13012-015-0300-7), 2015-08-08

Additional File 1

Figure- TDF domains linked to Capability, Opportunity, Motivation components

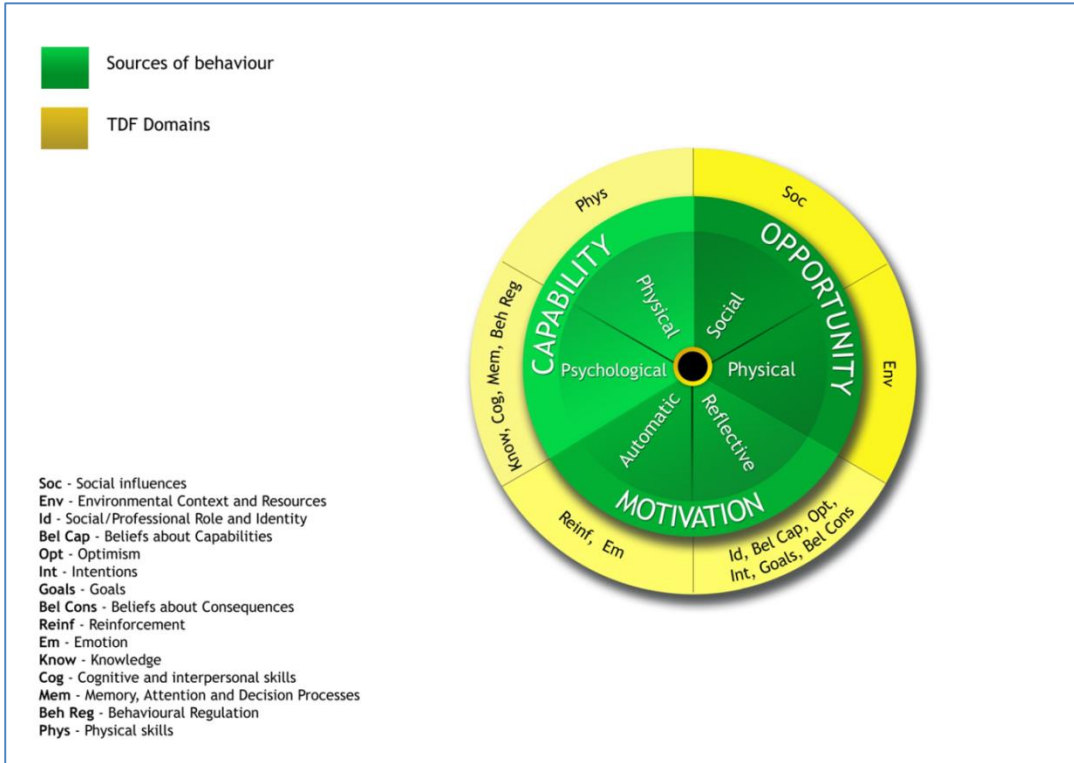

Supplement: 13012_2015_300_MOESM1_ESM.pdf [file 13012_2015_300_MOESM1_ESM.pdf]
