# Supplementary material for: Characterising an implementation intervention in terms of behaviour change techniques and theory: the ‘Sepsis Six’ clinical care bundle
Source: PubMed Central journal article supplement (PMC4529730; doi:10.1186/s13012-015-0300-7), 2015-08-08
Supplement: 13012_2015_300_MOESM3_ESM.pdf [file 13012_2015_300_MOESM3_ESM.pdf]

MS 1132100059162845

**Additional File 3**

**Expert consensus linking BCTs to TDF Domains**

from Cane et al. (2015). From 'Lists of behaviour change techniques (BCTs) to structured hierarchies: Comparison of two methods of developing a hierarchy of BCTs'. *British Journal of Health Psychology* 20(1): 130-150.

| <b>TDF domain</b>                     | <b>BCT</b>                               |
|---------------------------------------|------------------------------------------|
| <b>Knowledge</b>                      | Health consequences                      |
|                                       | Biofeedback                              |
|                                       | Antecedents                              |
|                                       | Feedback on behaviour                    |
| <b>Skills</b>                         | Graded tasks                             |
|                                       | Behavioural rehearsal / practice         |
|                                       | Habit reversal                           |
|                                       | Body changes                             |
|                                       | Habit formation                          |
| <b>Professional Role and Identity</b> | <i>No BCTs are linked to this domain</i> |
| <b>Beliefs about Capabilities</b>     | Verbal persuasion to boost self-efficacy |
|                                       | Focus on past Success                    |
| <b>Optimism</b>                       | Verbal persuasion to boost self-efficacy |
| <b>Beliefs about Consequences</b>     | Emotional consequences                   |
|                                       | Salience of consequences                 |
|                                       | Covert sensitisation                     |
|                                       | Anticipated regret                       |
|                                       | Social and environmental consequences    |
|                                       | Comparative imagining of future outcomes |
|                                       | Vicarious reinforcement                  |
|                                       | Threat                                   |
|                                       | Pros and cons                            |
|                                       | Covert conditioning                      |
| <b>Reinforcement</b>                  | Threat                                   |
|                                       | Self-reward                              |
|                                       | Differential reinforcement               |
|                                       | Incentive                                |
|                                       | Thinning                                 |
|                                       | Negative reinforcement                   |
|                                       | Shaping                                  |
| Counter conditioning                  |                                          |

| <b>TDF domain</b>                               | <b>BCT</b>                                              |
|-------------------------------------------------|---------------------------------------------------------|
|                                                 | Discrimination training                                 |
|                                                 | Material reward                                         |
|                                                 | Social reward                                           |
|                                                 | Non-specific reward                                     |
|                                                 | Response cost                                           |
|                                                 | Anticipation of future rewards or removal of punishment |
|                                                 | Punishment                                              |
|                                                 | Extinction                                              |
|                                                 | Classical conditioning                                  |
| <b>Intentions</b>                               | Commitment                                              |
|                                                 | Behavioural contract                                    |
| <b>Goals</b>                                    | Goal setting (outcome)                                  |
|                                                 | Goal setting (behaviour)                                |
|                                                 | Review of outcome goal(s)                               |
|                                                 | Review behaviour goals                                  |
|                                                 | Action planning (including implementation intentions)   |
| <b>Memory, Attention and Decision Processes</b> | <i>No BCTs are linked to this domain</i>                |
| <b>Environmental Context and Resources</b>      | Restructuring the physical environment                  |
|                                                 | Discriminative (learned) cue                            |
|                                                 | Prompts / cues                                          |
|                                                 | Restructuring the social environment                    |
|                                                 | Avoidance / changing exposure to cues for the behaviour |
| <b>Social Influences</b>                        | Social comparison                                       |
|                                                 | Social support or encouragement (general)               |
|                                                 | Information about others' approval                      |
|                                                 | Social support (emotional)                              |
|                                                 | Social support (practical)                              |
|                                                 | Vicarious reinforcement                                 |
|                                                 | Restructuring the social environment                    |
|                                                 | Modelling or demonstrating the behaviour                |
|                                                 | Identification of self as role model                    |
|                                                 | Social reward                                           |
| <b>Emotion</b>                                  | Reduce negative emotions                                |
|                                                 | Emotional consequences                                  |
|                                                 | Self-assessment of affective consequences               |
|                                                 | Social support (emotional)                              |
| <b>Behavioural Regulation</b>                   | Self-monitoring of behaviour                            |
